# Supplementary material
Source: PubMed Central journal article supplement (PMC7127076)
Supplement: mmc1.pdf [file mmc1.pdf]

**Table S1.** Primers used in this study

| <b>Primer name</b> | <b>Primer sequence</b>         |
|--------------------|--------------------------------|
| 5'-RACE-in-p       | TCAGACCGTAGAACAGGTGGCTTCACTC   |
| 5'-RACE-ex-p       | CGCATGGATCGGTGTAGCTGGAATTGC    |
| 3'-RACE-in-p       | GCAATTCCAGCTACACCGATCCATGCG    |
| 3'-RACE-ex-p       | GAGTGAAGCCACCTGTTCTACGGTCTGA   |
| LsACE-ORF-F        | ATGGATCATTACATGAGCGTAG         |
| LsACE-ORF-R        | TTAGATTGCATTTCTTAAAG           |
| LsACE-EXPS-F       | CTGCATATGGCCATGGAGCTTTTGTGGTTG |
| LsACE-EXPS-R       | GCAGGTCGACGGATCCGATTGCATTTCTTA |
| RdRp-qPCR-F        | CTTGAGAATGCCAGTGGAAGA          |
| RdRp-qPCR-R        | CATGCTGGATATTATGCTACCT         |
| NS2-qPCR-F         | CTGGATCATATGATAATCTCTTC        |
| NS2-qPCR-R         | GTTGCTATGGCGAGAGCATGT          |
| NSvc2-qPCR-F       | ACAAGCCAAGATATCACTGAGA         |
| NSvc2-qPCR-R       | CAAGGAAGCGATCACCAGTAT          |
| NS3-qPCR-F         | ACGATGTCCATTGTTCTTCAAG         |
| NS3-qPCR-R         | AGCCTAGAGTGACAGCATCAT          |
| CP-qPCR-F          | GGAACAAATGCCAATGCTATC          |
| CP-qPCR-R          | TGAGACATTTGGGAATAGCTGA         |
| SP-qPCR-F          | GTGAAGATGATGACAATGCTCT         |
| SP-qPCR-R          | CTTGATGATCTGATCCAGGAG          |
| NSvc4-qPCR-F       | ATTGGTCTTCATGGACACTGG          |
| NSvc4-qPCR-R       | GAGGATAAGCATAATCTTCAAGT        |
| LsACE-qPCR-F       | ACAACTGTCATTGGTGGGA            |
| LsACE-qPCR-R       | TGGAGCGGTGTAGCTGGAA            |
| UBQ-qPCR-F         | CACTTCGACCGCCACTACT            |
| UBQ-qPCR-R         | TGTTCAAGTTCCAAGGAGACTA         |
| EF2-qPCR-F         | GTCTCCACGGATGGGCTTT            |

|               |                                          |
|---------------|------------------------------------------|
| EF2-qPCR-R    | ATCTTGAATTTCTCGGCATACATT                 |
| LsACE-dsRNA-F | TAATACGACTCACTATAGGTTTCAGCAGCCACATACACCA |
| LsACE-dsRNA-R | TAATACGACTCACTATAGGAGCACTGTGCCAATAAAGTAC |
| GFP-dsRNA-F   | TAATACGACTCACTATAGGCACAAGTTCAGCGTGTCCG   |
| GFP-dsRNA-R   | TAATACGACTCACTATAGGGTTCACCTTGATGCCGTT    |

---
